# Supplementary material for: Surface Protection of Wood with Metal Acetylacetonates
Source: MDPI journal article supplement (doi:10.3390/coatings11080916), 2021-07-30
Supplement: s1 [file s1]

# Supplementary Materials: Surface Protection of Wood with Metal Acetylacetonates

Yuner Zhu and Philip D. Evans \*

Department of Wood Science, University of British Columbia, Vancouver, BC V6T1Z4, Canada; zhu.yuner1@gmail.com

\* Correspondence: phil.evans@ubc.ca; Tel.: +1-604-822-0517; Fax: +1-604-822-9159

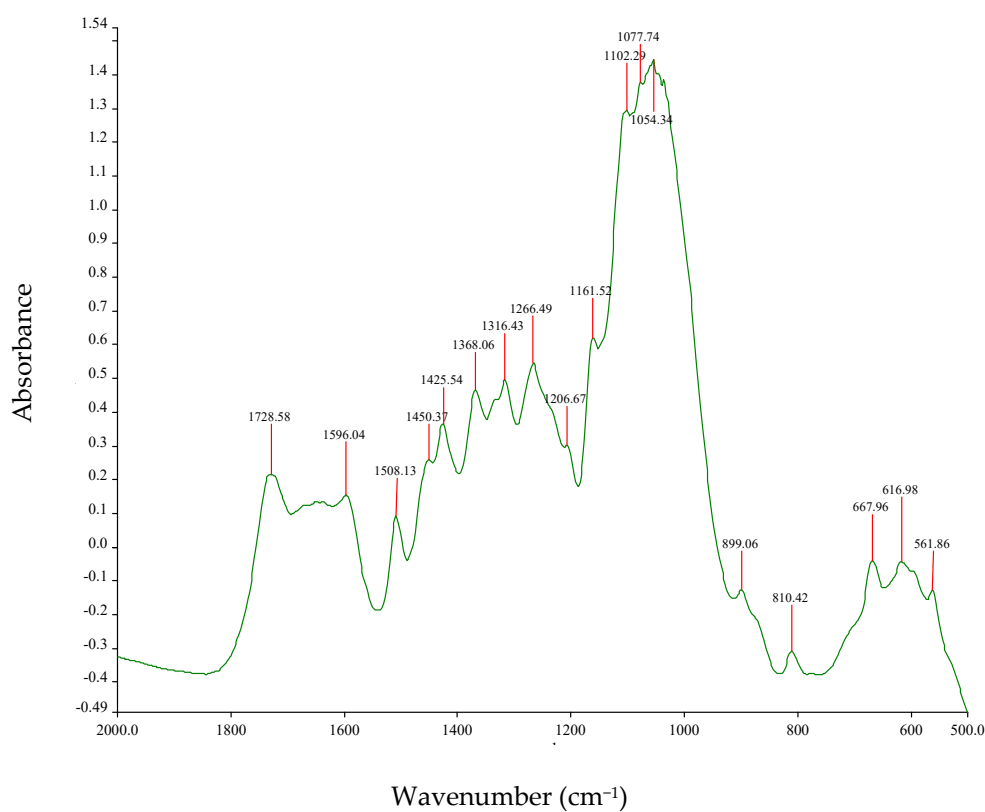

**Citation:** Zhu, Y.; Evans, P.D. Surface Protection of Wood with Metal Acetylacetonates. *Coatings* **2021**, *11*, 916. <https://doi.org/10.3390/coatings11080916>

Academic Editor: Benedetto Pizzo

Received: 30 June 2021

Accepted: 27 July 2021

Published: 30 July 2021

**Publisher's Note:** MDPI stays neutral with regard to jurisdictional claims in published maps and institutional affiliations.

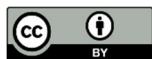

**Copyright:** © 2021 by the authors. Licensee MDPI, Basel, Switzerland. This article is an open access article distributed under the terms and conditions of the Creative Commons Attribution (CC BY) license (<http://creativecommons.org/licenses/by/4.0/>).

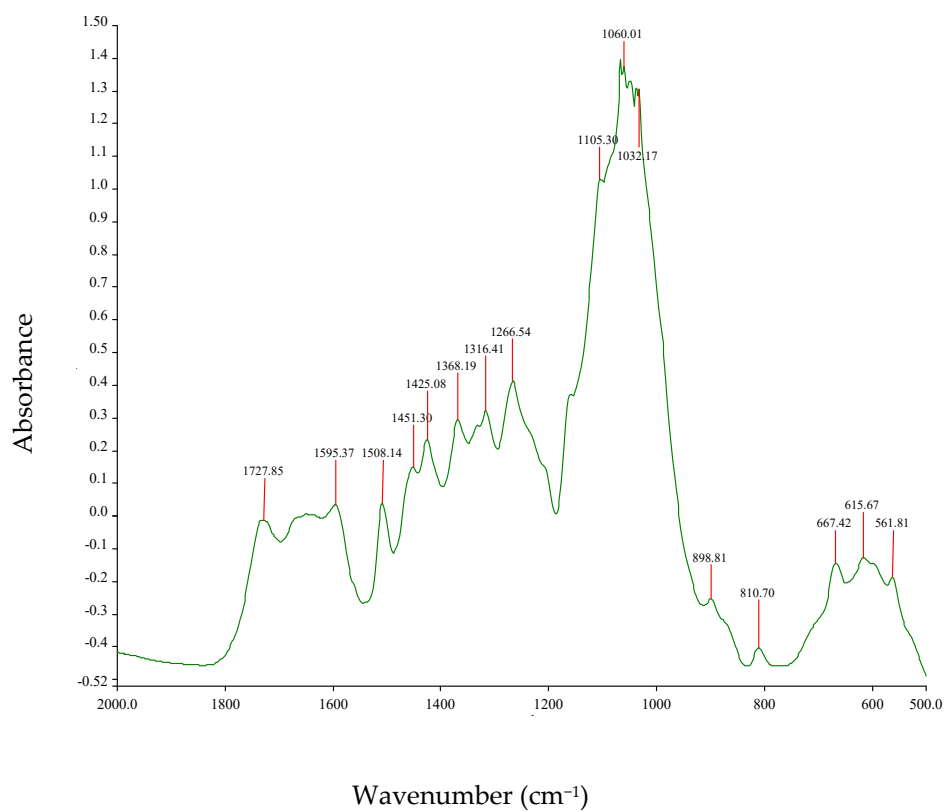

(b)

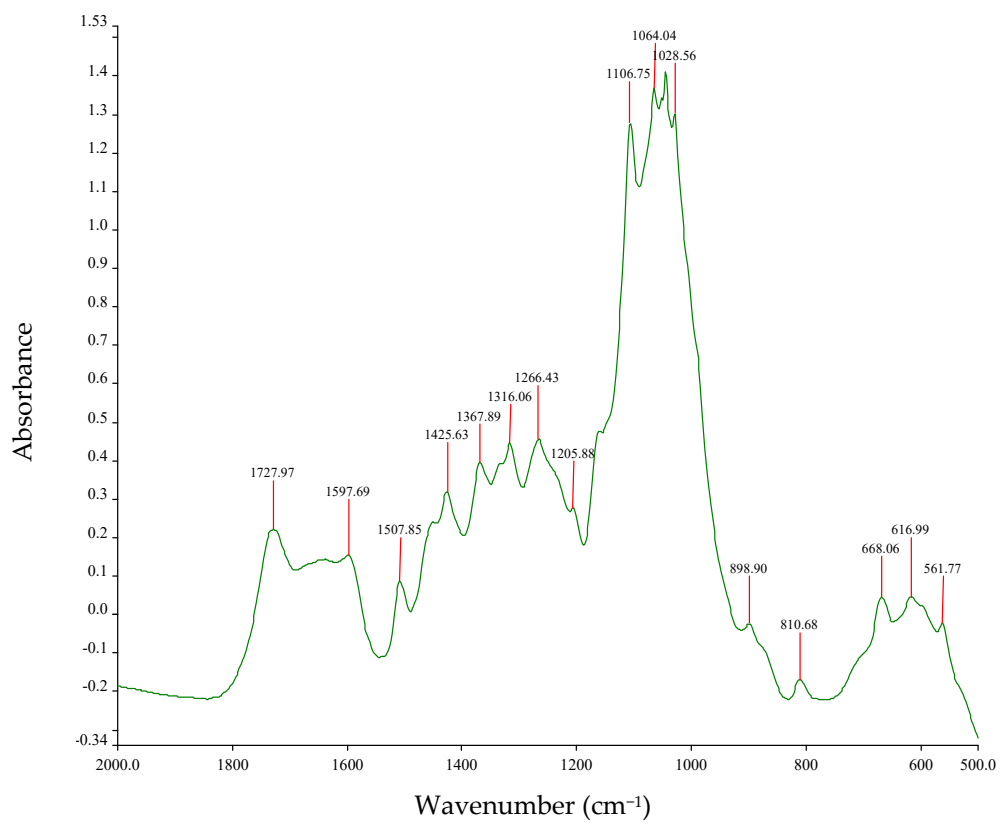

(c)

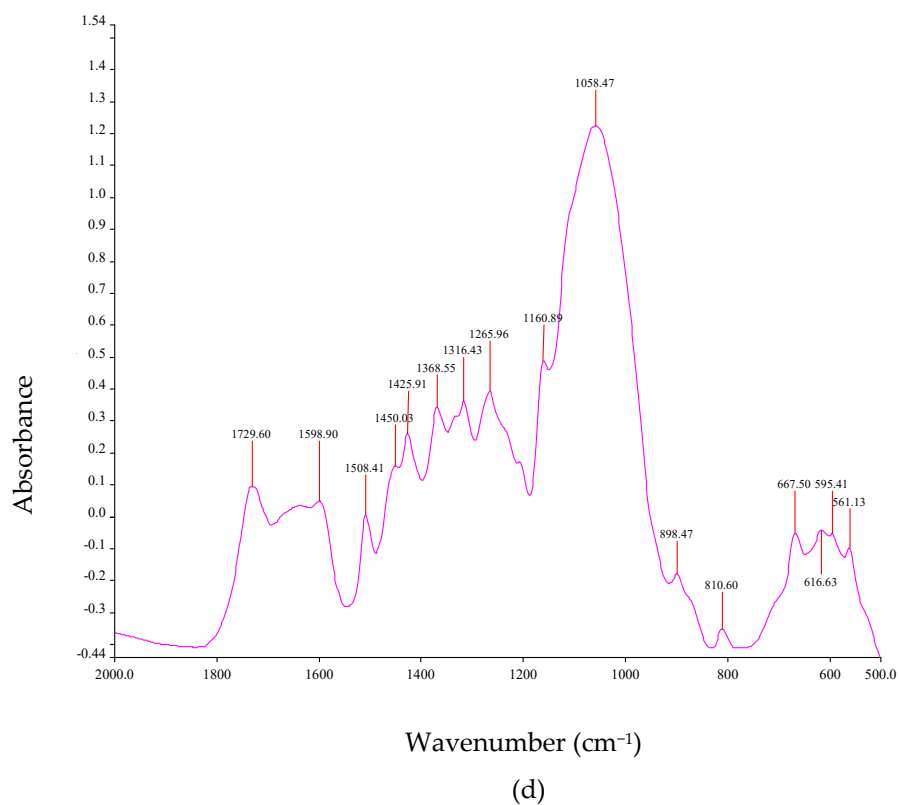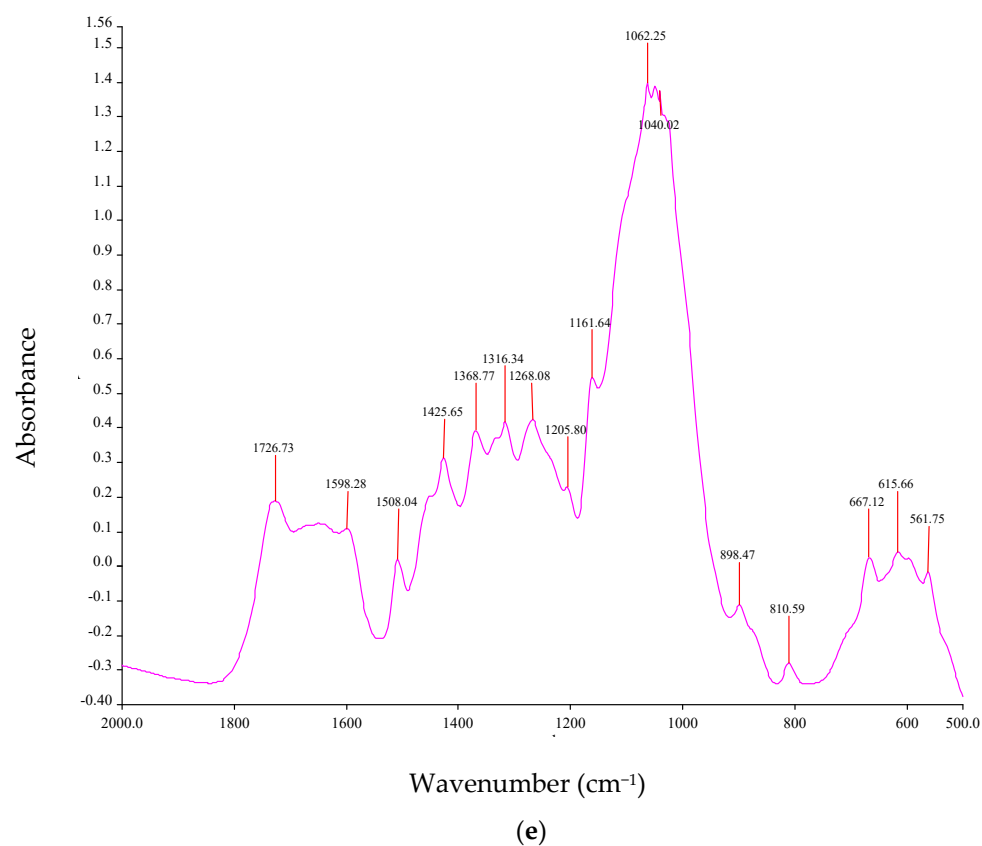

**Figure S1.** FTIR spectra of treated wood veneers after 20 days of natural weathering: (a) Chromium acetylacetonate; (b) Iron acetylacetonate; (c) Manganese acetylacetonate; (d) Nickel acetylacetonate; (e) Titanium acetylacetonate.

**Table S1.** Properties of yellow cedar boards used to prepare uncoated panels for weathering trial.

| Board Number | Basic Density (kg/m <sup>3</sup> ) | No. Growth Rings/cm |
|--------------|------------------------------------|---------------------|
| 1            | 377                                | 9–17                |
| 2            | 406                                | 15–39               |
| 3            | 386                                | 10–18               |
| 4            | 429                                | 19–35               |
| 5            | 352                                | 7–12                |

**Table S2.** Properties of yellow cedar boards used to prepare coated panels for weathering trial.

| Board number | Basic Density (kg/m <sup>3</sup> ) | No. Growth Rings/cm |
|--------------|------------------------------------|---------------------|
| 1            | 402                                | 22–37               |
| 2            | 503                                | 35–44               |
| 3            | 376                                | 10–18               |
| 4            | 480                                | 35–45               |

**Table S3.** Properties of polyurethane coating applied to treated panels and untreated controls <sup>1</sup>.

| Property                 | Unit              | Value   |
|--------------------------|-------------------|---------|
| Viscosity <sup>2</sup>   | Seconds           | 95      |
| Solids content           | Weight percentage | 45 ± 1  |
| Solids content           | Volume percentage | 40 ± 1  |
| Coverage                 | m <sup>2</sup> /L | 9.3     |
| Wet thickness of coating | Microns           | 100–150 |
| Number of coats          | No.               | 2       |
| Drying time              | Hours             | 6       |

<sup>1</sup> Provided by the manufacturer; <sup>2</sup> DIN flow cup No. 6 at 20°C.
